# Supplementary material for: Olive Oil Extracts and Oleic Acid Attenuate the LPS-Induced Inflammatory Response in Murine RAW264.7 Macrophages but Induce the Release of Prostaglandin E2
Source: MDPI journal article supplement (doi:10.3390/nu13124437), 2021-12-11
Supplement: s1 [file s1]

## Olive oil extracts and oleic acid attenuate the LPS-induced inflammatory response in murine RAW264.7 macrophages but induce the release of prostaglandin E<sub>2</sub>

Anke Katharina Müller<sup>1,2</sup>, Franziska Albrecht<sup>1</sup>, Carsten Rohrer<sup>1,2</sup>, Andreas Koeberle<sup>4,5</sup>, Oliver Werz<sup>5</sup>, Wiebke Schlörmann<sup>2,3</sup>, Michael Gleis<sup>2,3</sup>, Stefan Lorkowski<sup>1,2</sup>, Maria Wallert<sup>1,2\*</sup>

Supplementary Table S1: Concentration of major fatty acids in OOE<sup>1</sup>.

| Fatty acid    | Concentration [mol/l] |
|---------------|-----------------------|
| C16:0         | 0.379                 |
| C16:1c9       | 0.022                 |
| C18:0         | 0.076                 |
| C18:1c9       | 2.517                 |
| C18:2c9,12    | 0.180                 |
| C18:3c9,12,15 | 0.017                 |
| C20:0         | 0.010                 |
| <b>Total</b>  | <b>3.200</b>          |

<sup>1</sup> OOE, olive oil extract.

**Supplementary Table S2: PCR primers used in this study.** In each case, forward and reverse primers are located in different exons.

| mRNA         | mRNA name                           | GenBank accession no. | Forward primer               | Reverse primer              | Amplicon size [bp] |
|--------------|-------------------------------------|-----------------------|------------------------------|-----------------------------|--------------------|
| Cox2         | Cyclooxygenase 2                    | NM_011198             | TCCCTGAAGCCGTACACAT<br>CA    | TGGACGAGGTTTTTCCAC<br>CA    | 132                |
| Il1 $\beta$  | Interleukin 1 beta                  | NM_008361.3           | TGAAGTTGACGGACCCCAA<br>A     | CAGCCACAATGAGTGAT<br>ACTGCC | 140                |
| Il6          | Interleukin 6                       | NM_031168.1           | TCAATTCCAGAAACCGCTAT<br>GAA  | GGAAGGCCGTGGTTGTCA<br>C     | 94                 |
| Il10         | Interleukin 10                      | NM_010548.2           | AAATAAGAGCAAGGCAGTG<br>GAGC  | TCATTCATGGCCTTGTAG<br>ACACC | 81                 |
| iNos         | Inducible nitric oxide<br>synthases | NM_010927.3           | GAGCGAGGAGCAGGTGGA<br>A      | CCATAGGAAAAGACTGC<br>ACCGA  | 90                 |
| Ppib         | Peptidylprolyl isomerase B          | NM_011149.2           | AAACAGCAAGTTCCATCGT<br>GTCAT | GAAGCGCTCACCATAGAT<br>GCTCT | 103                |
| Tnf $\alpha$ | Tumor necrosis factor $\alpha$      | NM_013693             | AGAAACACAAGATGCTGGG<br>ACAGT | CCTTTGCAGAACTCAGGA<br>ATGG  | 46                 |

---

**Supplementary Table S3: MTT cell viability of RAW264.7 cells (%)**

| Concentration ( $\mu$ M) | OOE <sup>1</sup> | OA <sup>2</sup>  |
|--------------------------|------------------|------------------|
| 0                        | 100 $\pm$ 0      | 100 $\pm$ 0      |
| 1                        | 106.9 $\pm$ 2.9  | 95.1 $\pm$ 6.9   |
| 5                        | 116.2 $\pm$ 7.8  | 101.6 $\pm$ 8.5  |
| 10                       | 116.0 $\pm$ 6.2  | 100.5 $\pm$ 10.6 |
| 50                       | 112.8 $\pm$ 4.9  | 105.3 $\pm$ 10.2 |
| 100                      | 114.1 $\pm$ 5.9  | 109.4 $\pm$ 6.9  |
| 200                      | 127.7 $\pm$ 9.6  | 115.1 $\pm$ 9.0  |

<sup>1</sup> OOE, olive oil extract; <sup>2</sup> OA, Oleic acid

**Supplementary Table S4: Fatty acid composition (% of total FAME<sup>1</sup>) of olive oil extracts**

|                               | O1   | O2   | O3   | O4   | O5   |
|-------------------------------|------|------|------|------|------|
| C16:0                         | 9.4  | 10.3 | 10.6 | 14.6 | 12.2 |
| C18:0                         | 2.9  | 2.4  | 2.3  | 2.1  | 2.3  |
| C18:1c9                       | 81.3 | 78.0 | 77.8 | 66.9 | 72.8 |
| C18:2 n-6 (LA) <sup>2</sup>   | 3.3  | 5.6  | 5.5  | 11.4 | 8.4  |
| C-18:3 n-3 (ALA) <sup>3</sup> | 0.5  | 0.5  | 0.5  | 0.5  | 0.5  |

<sup>1</sup> FAME, fatty acid methyl esters. <sup>2</sup> LA, linoleic acid. <sup>3</sup> ALA,  $\alpha$ -linolenic acid.

---
